# Supplementary material for: Towards hydroperoxovanadium complexes: the X-ray crystal structure of a peroxovanadium(v) complex containing a V(O2)(RCO2H)(H2O)2 cluster with hydrogen bond inter-linkages
Source: Royal Society of Chemistry journal article supplement (doi:10.1039/b101010g), 2001-01-01
Supplement: b101010g.doc [file b101010g.doc]

*Synthesis of the ligand bpaH* (cf. Scheme) 3.10 g (10 mmol) bis(2-pyridylmethyl)amine·3HCl and 1.53 g (10 mmol) 3-bromopropionic acid were suspended, in an inert gas atmosphere, in 30 ml absolute ethanol. Addition of 6 ml (43 mmol) of triethylamine resulted in a complete dissolution of the compounds. The solution was refluxed over night and cooled back to room temp. After removal of the main amount of triethylammonium halides by filtration, the solution was cooled in an ice-bath and diethyl ether was added drop-wise until the beginning precipitation of the ligand. Upon standing in the fridge for a couple of hours, the main amount of pure bpaH precipitated. The product was filtered off, washed with a few ml of cold ether and dried in vacuo to yield 0.68 g (25 %) of bpaH. Analysis calcd. for C15H17N3O2 (M = 271.3) C, 66.40; H, 6.32; N, 15.49. Found C, 66.74; H, 6.55, N, 15.10. 1H NMR (200 MHz, D2O): ** 8.56 (*m*, 2H, py-*H*2), 7.94-7.85 (*m*, 2H, py-*H*4), and 7.51-7.43 (*m*, 4H, py-*H*3/5), 4.49 (*s*, 4H, C*H*2), 3.49 (*t* [*J* = 6.5 Hz], 2H, C*H*2), 2.65 (*t* [*J* = 6.44 Hz], 2H, C*H*2). IR (KBr), cm‑1: 2832, 2493, 1705, 1413, 771.

*Preparation of [VO(O2)bpaH]ClO4·nH2O:* 0.028 g (0.2 mmol) K[VO3] were dissolved in 25 ml of water, placed in an ice-bath, and treated with a solution of 0.054 g (0.2 mmol) bpaH dissolved in 5 ml of cold water. A dark yellow solution of pH 8.5 was obtained, which changed to orange and further to red on addition of 0.5 ml of 30% H2O2; pH = 7.1. The pH was adjusted to 1.7 by careful addition of 8 mM HClO4; the orange colour was thus restored. Crystals of the complex with *n* = 2, suitable for an X-ray diffraction analysis, were obtained by addition of an equal volume of ethanol and allowing the solution to stand at 2 °C for a couple of weeks. Due to equilibria between the complex and other vanadium species in solution (see text), bulk amounts of the complex could not be obtained in an analytically pure form.
